# Supplementary material for: The Use of Levosimendan after Out-of-Hospital Cardiac Arrest and Its Association with Outcome—An Observational Study
Source: MDPI journal article supplement (doi:10.3390/jcm11092621), 2022-05-06
Supplement: s1 [file s1]

Supplementary Table S3a. Baseline characteristics in subgroups of time-to-treatment-start with levosimendan in out-of-hospital-cardiac arrest patients admitted to the intensive care unit in Stockholm, Sweden, 2010-2016.

| Characteristics                                 | Levosimendan < 6h<br>(n=47) | p-value | Levosimendan 6-12h<br>n=31 | p-value | Levosimendan 12-24h<br>(n=16) | p-value | No levosimendan<br>(n=846) |
|-------------------------------------------------|-----------------------------|---------|----------------------------|---------|-------------------------------|---------|----------------------------|
| <b><i>Sex, n= (%)</i></b>                       |                             |         |                            |         |                               |         |                            |
| Male (=1)                                       | 37 (79)                     | 0.10    | 24 (77)                    | 0.23    | 15 (94)                       | 0.02    | 568 (67)                   |
| <b><i>Age, year</i></b>                         |                             |         |                            |         |                               |         |                            |
| Median                                          | 67 (62-74)                  | 0.71    | 65 (55-75)                 | 0.67    | 67 (59-75)                    | 0.97    | 67 (56-77)                 |
| <b><i>Acute myocardial ischemia, n= (%)</i></b> |                             |         |                            |         |                               |         |                            |
| Myocardial infarction, any                      | 22 (47)                     | <0.001  | 14 (45)                    | 0.01    | 8 (50)                        | 0.01    | 199 (24)                   |
| STEMI                                           | 19 (86)                     | 0.002   | 10 (71)                    | 0.15    | 4 (50)                        | 0.92    | 103 (52)                   |
| <b><i>CPR characteristics n= (%)</i></b>        |                             |         |                            |         |                               |         |                            |
| Shockable rhythm                                | 30 (64)                     | <0.001  | 20 (65)                    | 0.002   | 12 (75)                       | 0.01    | 311 (37)                   |
| Witnessed event*                                | 34/44 (77)                  | 0.46    | 23 (74)                    | 0.81    | 14/15 (93)                    | 0.07    | 574/795 (72)               |
| Bystander CPR *                                 | 31/44 (71)                  | 0.002   | 10 (32)                    | 0.13    | 12/15 (80)                    | 0.01    | 364/792 (46)               |
| Respons-time, minutes median (IQR)*             | 9 (6-14)                    | 0.84    | 11/25 (8-18)               | 0.16    | 8 (5-12)                      | 0.19    | 9 (7-13)                   |
| Coronary angiography + PCI                      | 18 (38)                     | <0.001  | 11(36)                     | <0.001  | 8 (50)                        | <0.001  | 112 (13)                   |

Data are presented as median (IQR) for continuous measures, and n (%) for categorical measures. Abbreviations: OHCA= out-of-hospital-cardiac arrest; ICU = intensive care unit; STEMI= ST-elevation myocardial infarction; CPR= cardiopulmonary resuscitation; PCI= percutaneous coronary intervention. \* missing values. In the variables with missing valus we present nominator-denominator.

Supplementary Table S3b. Interventions and outcomes in subgroups of time-to-treatment-start with levosimendan in out-of-hospital-cardiac arrest patients admitted to the intensive care unit in Stockholm, Sweden, 2010-2016

| <b>Characteristics</b>                               | Levosimendan < 6hours<br>n=47 | p-value | Levosimendan 6-12h<br>n=31 | p-value | Levosimendan 12-24h<br>n=16 | p-value | No levosimendan<br>n=846 |
|------------------------------------------------------|-------------------------------|---------|----------------------------|---------|-----------------------------|---------|--------------------------|
| <b><i>ICU-interventions and outcome</i></b>          |                               |         |                            |         |                             |         |                          |
| <b><i>Vasoactive / inotropic support, n= (%)</i></b> |                               |         |                            |         |                             |         |                          |
| Noradrenaline                                        | 46 (98)                       | <0.001  | 30 (97)                    | <0.001  | 16 (100)                    | <0.001  | 515 (61)                 |
| Adrenaline                                           | 9 (19)                        | 0.01    | 4 (13)                     | 0.16    | 1 (6)                       | 0.97    | 55 (7)                   |
| Amiodarone                                           | 6 (13)                        | 0.02    | 6 (19)                     | <0.001  | 3 (19)                      | 0.01    | 40 (5)                   |
| Milrinone                                            | 9 (19)                        | <0.001  | 1 (3)                      | 0.12    | 4 (25)                      | <0.001  | 6 (1)                    |
| Dobutamine                                           | 7 (15)                        | 0.08    | 6 (19)                     | 0.02    | 5 (31)                      | <0.001  | 65 (8)                   |
| Arginine vasopressin                                 | 0 (0)                         | 0.50    | 1 (3)                      | 0.22    | 0 (0)                       | 0.70    | 8 (1)                    |
| Cardiogenic shock *                                  | 7/30 (23)                     | 0.30    | 3/18 (17)                  | 0.94    | 3/10 (30)                   | 0.24    | 52/326 (16)              |
| TTM *                                                | 21/35 (60)                    | 0.01    | 16/24 (67)                 | 0.01    | 8/12 (67)                   | 0.04    | 237/629 (38)             |
| ICU stay days, median (IQR)*                         | 3 (2-6)                       | 0.01    | 3 (2-6)                    | 0.01    | 6 (4-9)**                   | <0.001  | 2 (1-4)                  |
| Mortality, 30-days, n= (%)                           | 21 (45)                       | <0.001  | 24 (77)                    | 0.36    | 9 (56)                      | 0.25    | 590 (70)                 |

Data are presented as median (IQR) for continuous measures, and n (%) for categorical measures. Abbreviations: ICU = intensive care unit; TTM= targeted temperature management. \* missing values. In the variables with missing value we present nominator-denominator.
