# Supplementary material for: The Use of Levosimendan after Out-of-Hospital Cardiac Arrest and Its Association with Outcome—An Observational Study
Source: MDPI journal article supplement (doi:10.3390/jcm11092621), 2022-05-06
Supplement: s1 [file s1]

Table S2a. Baseline characteristics and outcome before propensity score matching

|                                      | Control     | Levosimendan   | p      | SMD  |
|--------------------------------------|-------------|----------------|--------|------|
| n                                    | 846         | 94             |        |      |
| Sex, male, n (%)                     | 568 (67)    | 76 (81)        | 0.01   | 0.32 |
| Age (median [IQR])                   | 67 [56, 77] | 66.00 [60, 74] | 0.99   | 0.10 |
| Witnessed arrest, n (%)              | 617 (73)    | 73 (78)        | 0.39   | 0.11 |
| Shockable rhythm, n (%)              | 312 (37)    | 62 (66)        | <0.001 | 0.61 |
| Myocardial infarction, n (%)         | 199 (24)    | 44 (47)        | <0.001 | 0.50 |
| EMS response, minutes (median [IQR]) | 9 [7, 13]   | 10 [6, 14]     | 0.76   | 0.07 |
| Bystander CPR, n (%)                 | 391 (46)    | 54 (57)        | 0.05   | 0.23 |
| Dead at 30 days, n (%)               | 593 (70)    | 55 (59)        | 0.03   | 0.24 |

Table S2b. Baseline characteristics and outcome after propensity score matching

|                                      | Control     | Levosimendan | p    | test    |
|--------------------------------------|-------------|--------------|------|---------|
| n                                    | 93          | 93           |      |         |
| Sex, male, n (%)                     | 83 (89)     | 75 ( 81)     | 0.15 |         |
| Age (median [IQR])                   | 67 [58, 76] | 66 [60, 74]  | 0.90 | nonnorm |
| Witnessed arrest, n (%)              | 77 (83)     | 74 (80)      | 0.71 |         |
| Shockable rhythm, n (%)              | 51 (55)     | 61 (66)      | 0.18 |         |
| Myocardial infarction, n (%)         | 41 (44)     | 43 (46)      | 0.88 |         |
| EMS response, minutes (median [IQR]) | 9 [6, 13]   | 10 [7, 14]   | 0.94 | nonnorm |
| Bystander CPR, n (%)                 | 60 (65)     | 55 (59)      | 0.55 |         |
| Dead at 30 days, n (%)               | 56 (60)     | 54 (58)      | 0.88 |         |
