# Supplementary material for: The Use of Levosimendan after Out-of-Hospital Cardiac Arrest and Its Association with Outcome—An Observational Study
Source: MDPI journal article supplement (doi:10.3390/jcm11092621), 2022-05-06
Supplement: s1 [file s1]

Supplementary Table S1a. Univariable and multivariable logistic regression analysis showing the association of different variables including levosimendan treatment (< 24 hours) and 30-day mortality in out-of-hospital-cardiac arrest patients admitted to the intensive care unit in Stockholm, Sweden, 2010-2016.

|                                                                                                                                             | Univariable            |         | Multivariable          |         |
|---------------------------------------------------------------------------------------------------------------------------------------------|------------------------|---------|------------------------|---------|
| Variable                                                                                                                                    | Odds Ratio<br>(95% CI) | p-value | Odds Ratio<br>(95% CI) | p-value |
| Levosimendan < 24 hours                                                                                                                     | 0.59 (0.38-0.90)       | 0.02    | 0.94 (0.56-1.57)       | 0.82    |
| Male sex (=1)                                                                                                                               | 0.54 (0.39-0.74)       | < 0.001 | 0.84 (0.58-1.22)       | 0.37    |
| Age, years                                                                                                                                  | 1.02 (1.01-1.03)       | < 0.001 | 1.03 (1.02-1.04)       | < 0.001 |
| Shockable rhythm                                                                                                                            | 0.12 (0.09-0.17)       | < 0.001 | 0.13 (0.09-0.19)       | < 0.001 |
| Witnessed event                                                                                                                             | 0.44 (0.31-0.63)       | < 0.001 | 0.57 (0.38-0.87)       | 0.01    |
| Bystander CPR                                                                                                                               | 0.46 (0.35-0.62)       | < 0.001 | 0.76 (0.54-1.07)       | 0.12    |
| Myocardial infarction                                                                                                                       | 0.41 (0.31-0.56)       | < 0.001 | 0.87 (0.59-1.28)       | 0.48    |
| Abbreviations: CI = confidence interval; CPR= cardiopulmonary resuscitation. Model area under the curve 0.80, Hosmer-Lemeshow p-value 0.40. |                        |         |                        |         |

Supplementary Table S1b. Univariable and multivariable logistic regression analysis showing the association of different variables including levosimendan treatment (< 24 hours) and 30-day mortality in out-of-hospital-cardiac arrest patients with initial shockable rhythm admitted to the intensive care unit in Stockholm, Sweden, 2010-2016.

|                                                                                                                                             | Univariable            |         | Multivariable          |         |
|---------------------------------------------------------------------------------------------------------------------------------------------|------------------------|---------|------------------------|---------|
| Variable                                                                                                                                    | Odds Ratio<br>(95% CI) | p-value | Odds Ratio<br>(95% CI) | p-value |
| Levosimendan < 24 hours                                                                                                                     | 1.45 (0.84-2.50)       | 0.18    | 1.35 (0.75-2.43)       | 0.32    |
| Male sex (=1)                                                                                                                               | 0.54 (0.39-0.74)       | < 0.001 | 0.69 (0.40-1.20)       | 0.19    |
| Age, years                                                                                                                                  | 1.02 (1.01-1.03)       | < 0.001 | 1.03 (1.02-1.05)       | < 0.001 |
| Witnessed event                                                                                                                             | 0.44 (0.31-0.63)       | < 0.001 | 0.47 (0.25-0.86)       | 0.02    |
| Bystander CPR                                                                                                                               | 0.46 (0.35-0.62)       | < 0.001 | 0.66 (0.42-1.06)       | 0.09    |
| Myocardial infarction                                                                                                                       | 0.41 (0.31-0.56)       | < 0.001 | 1.11 (0.70-1.77)       | 0.65    |
| Abbreviations: CI = confidence interval; CPR= cardiopulmonary resuscitation. Model area under the curve 0.67, Hosmer-Lemeshow p-value 0.20. |                        |         |                        |         |
